# Supplementary material for: Pharmacogenetics of opioid medications for relief of labor pain and post-cesarean pain: a systematic review and meta-analysis
Source: Springer Nature journal article supplement (doi:10.1007/s00228-024-03798-z), 2025-01-07
Supplement: MOESM1 [file 228_2024_3798_MOESM1_ESM.pdf]

**Supplementary Table 1.** MOOSE Checklist for Meta-analyses of Observational Studies.

| Item No                                     | Recommendation                                                                                                                                                                                                                                                               | Reported on Page No             |
|---------------------------------------------|------------------------------------------------------------------------------------------------------------------------------------------------------------------------------------------------------------------------------------------------------------------------------|---------------------------------|
| Reporting of background should include      |                                                                                                                                                                                                                                                                              |                                 |
| 1                                           | Problem definition                                                                                                                                                                                                                                                           | 3                               |
| 2                                           | Hypothesis statement                                                                                                                                                                                                                                                         | 3                               |
| 3                                           | Description of study outcome(s)                                                                                                                                                                                                                                              | 3                               |
| 4                                           | Type of exposure or intervention used                                                                                                                                                                                                                                        | 3                               |
| 5                                           | Type of study designs used                                                                                                                                                                                                                                                   | 3                               |
| 6                                           | Study population                                                                                                                                                                                                                                                             | 3                               |
| Reporting of search strategy should include |                                                                                                                                                                                                                                                                              |                                 |
| 7                                           | Qualifications of searchers (eg, librarians and investigators)                                                                                                                                                                                                               | 4                               |
| 8                                           | Search strategy, including time period included in the synthesis and key words                                                                                                                                                                                               | 4                               |
| 9                                           | Effort to include all available studies, including contact with authors                                                                                                                                                                                                      | 4                               |
| 10                                          | Databases and registries searched                                                                                                                                                                                                                                            | 4                               |
| 11                                          | Search software used, name and version, including special features used (eg, explosion)                                                                                                                                                                                      | -                               |
| 12                                          | Use of hand searching (eg, reference lists of obtained articles)                                                                                                                                                                                                             | 4                               |
| 13                                          | List of citations located and those excluded, including justification                                                                                                                                                                                                        | 5                               |
| 14                                          | Method of addressing articles published in languages other than English                                                                                                                                                                                                      | 4                               |
| 15                                          | Method of handling abstracts and unpublished studies                                                                                                                                                                                                                         | 4                               |
| 16                                          | Description of any contact with authors                                                                                                                                                                                                                                      | 4                               |
| Reporting of methods should include         |                                                                                                                                                                                                                                                                              |                                 |
| 17                                          | Description of relevance or appropriateness of studies assembled for assessing the hypothesis to be tested                                                                                                                                                                   | 4                               |
| 18                                          | Rationale for the selection and coding of data (eg, sound clinical principles or convenience)                                                                                                                                                                                | 5                               |
| 19                                          | Documentation of how data were classified and coded (eg, multiple raters, blinding and interrater reliability)                                                                                                                                                               | 5                               |
| 20                                          | Assessment of confounding (eg, comparability of cases and controls in studies where appropriate)                                                                                                                                                                             | 6                               |
| 21                                          | Assessment of study quality, including blinding of quality assessors, stratification or regression on possible predictors of study results                                                                                                                                   | 6                               |
| 22                                          | Assessment of heterogeneity                                                                                                                                                                                                                                                  | 6                               |
| 23                                          | Description of statistical methods (eg, complete description of fixed or random effects models, justification of whether the chosen models account for predictors of study results, dose-response models, or cumulative meta-analysis) in sufficient detail to be replicated | 6-7                             |
| 24                                          | Provision of appropriate tables and graphics                                                                                                                                                                                                                                 | 6                               |
| Reporting of results should include         |                                                                                                                                                                                                                                                                              |                                 |
| 25                                          | Graphic summarizing individual study estimates and overall estimate                                                                                                                                                                                                          | Fig. 2-4, Suppl. Fig. 4-11      |
| 26                                          | Table giving descriptive information for each study included                                                                                                                                                                                                                 | Table 1                         |
| 27                                          | Results of sensitivity testing (eg, subgroup analysis)                                                                                                                                                                                                                       | Fig 2-4, Suppl. Fig. 2, 4, 5-11 |

|    |                                                   |                           |
|----|---------------------------------------------------|---------------------------|
| 28 | Indication of statistical uncertainty of findings | Fig 2-4<br>Suppl Fig 1-11 |
|----|---------------------------------------------------|---------------------------|

| Item No                                 | Recommendation                                                                                                            | Reported on Page No |
|-----------------------------------------|---------------------------------------------------------------------------------------------------------------------------|---------------------|
| Reporting of discussion should include  |                                                                                                                           |                     |
| 29                                      | Quantitative assessment of bias (eg, publication bias)                                                                    | 12                  |
| 30                                      | Justification for exclusion (eg, exclusion of non-English language citations)                                             | 12                  |
| 31                                      | Assessment of quality of included studies                                                                                 | 10, 12              |
| Reporting of conclusions should include |                                                                                                                           |                     |
| 32                                      | Consideration of alternative explanations for observed results                                                            | 12-13               |
| 33                                      | Generalization of the conclusions (ie, appropriate for the data presented and within the domain of the literature review) | 13                  |
| 34                                      | Guidelines for future research                                                                                            | 13                  |
| 35                                      | Disclosure of funding source                                                                                              | 14                  |

*From:* Stroup DF, Berlin JA, Morton SC, et al, for the Meta-analysis Of Observational Studies in Epidemiology (MOOSE) Group. Meta-analysis of Observational Studies in Epidemiology. A Proposal for Reporting. *JAMA*. 2000;283(15):2008-2012. doi: 10.1001/jama.283.15.2008.

**Supplementary Fig. 1**

Trim-and-fill funnel plot of the standardized mean difference of pain score after opioid treatment for relief of labor pain and post-cesarean pain, for the dominant model of *OPRM1* rs1799971 (GG or AG vs AA) (adjusted SMD: 0.18; 95% CI 0.08–0.28, P = 0.001).

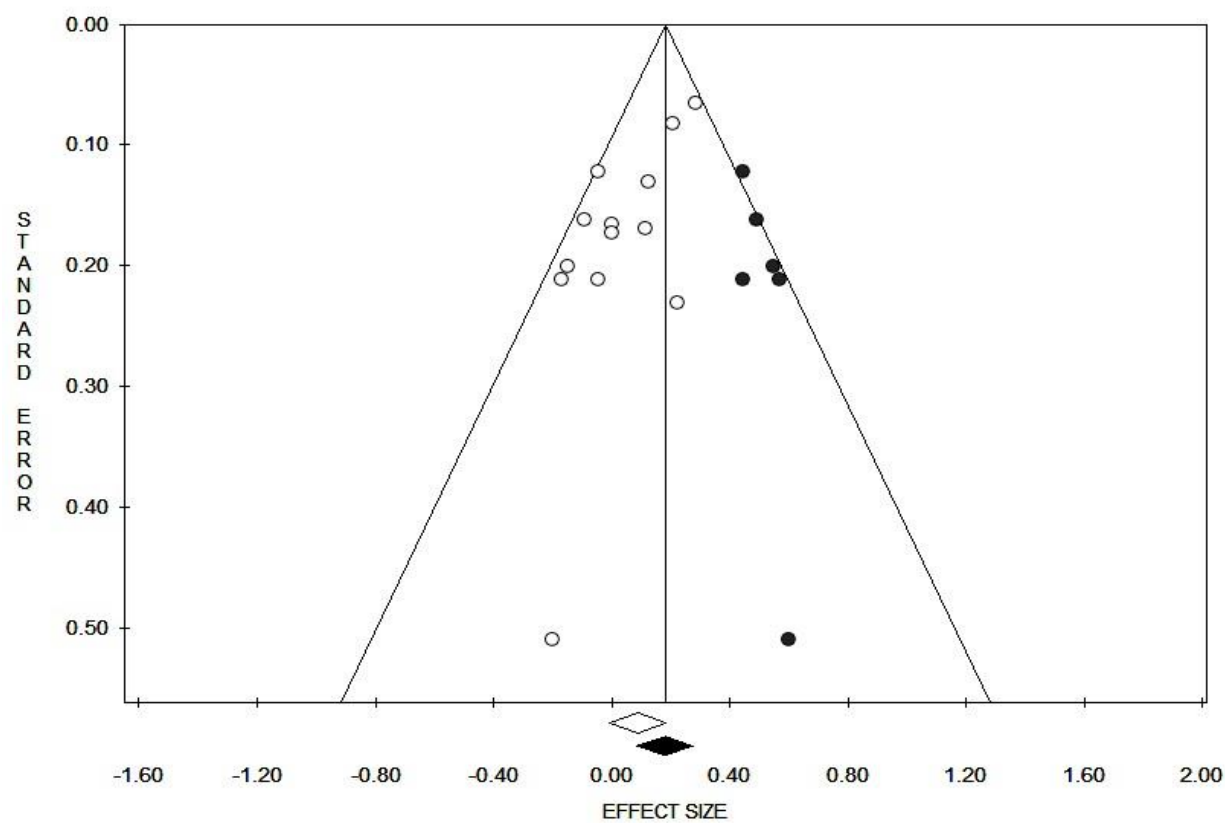

**Supplementary Fig. 2**

Leave-one-out meta-analyses for the standardized mean differences of total opioid consumption after opioid treatment for relief of labor pain and post-cesarean pain, for the dominant (GG or AG vs AA) (A) or the recessive model (GG vs AG or AA) (B) of *OPRM1* rs1799971.

**A**

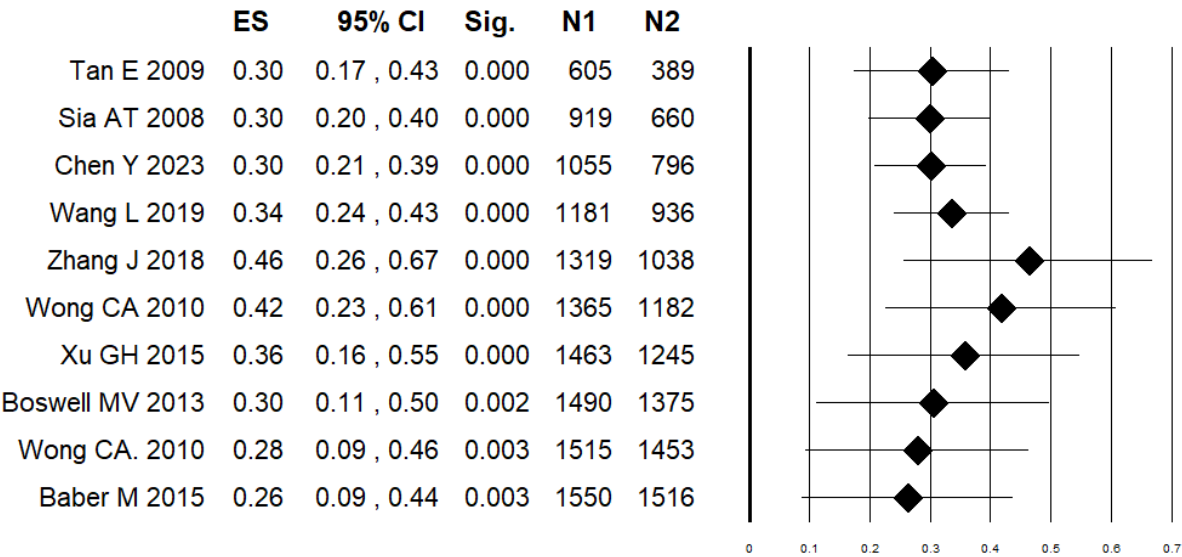

**B**

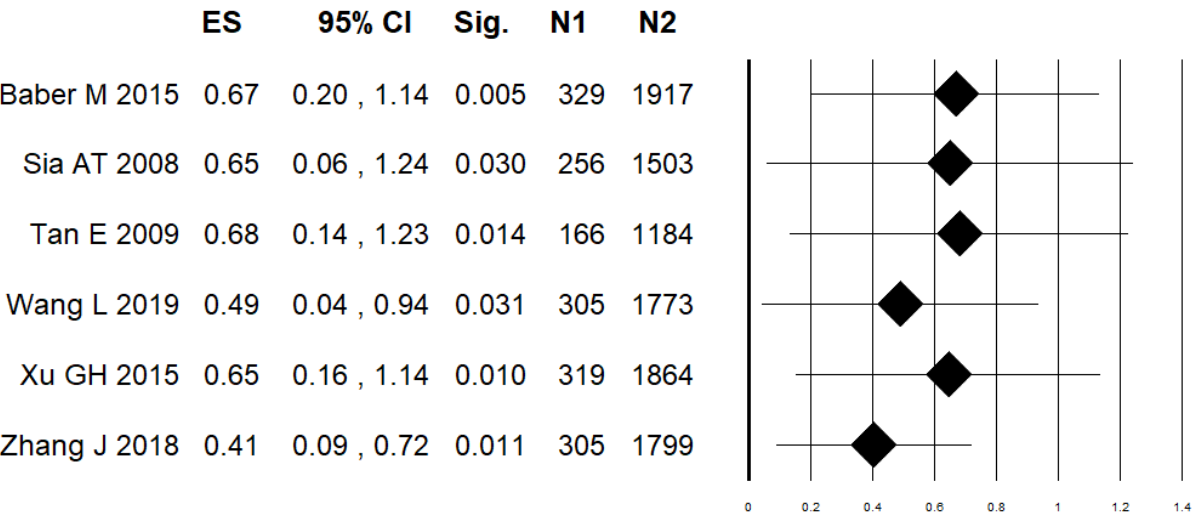

**Supplementary Fig. 3**

Funnel plot of the standardized mean difference of total opioid consumption after opioid treatment for relief of labor pain and post-cesarean pain, for the dominant model of *OPRM1* rs1799971 (GG or AG vs AA). Egger's test P-value = 0.431.

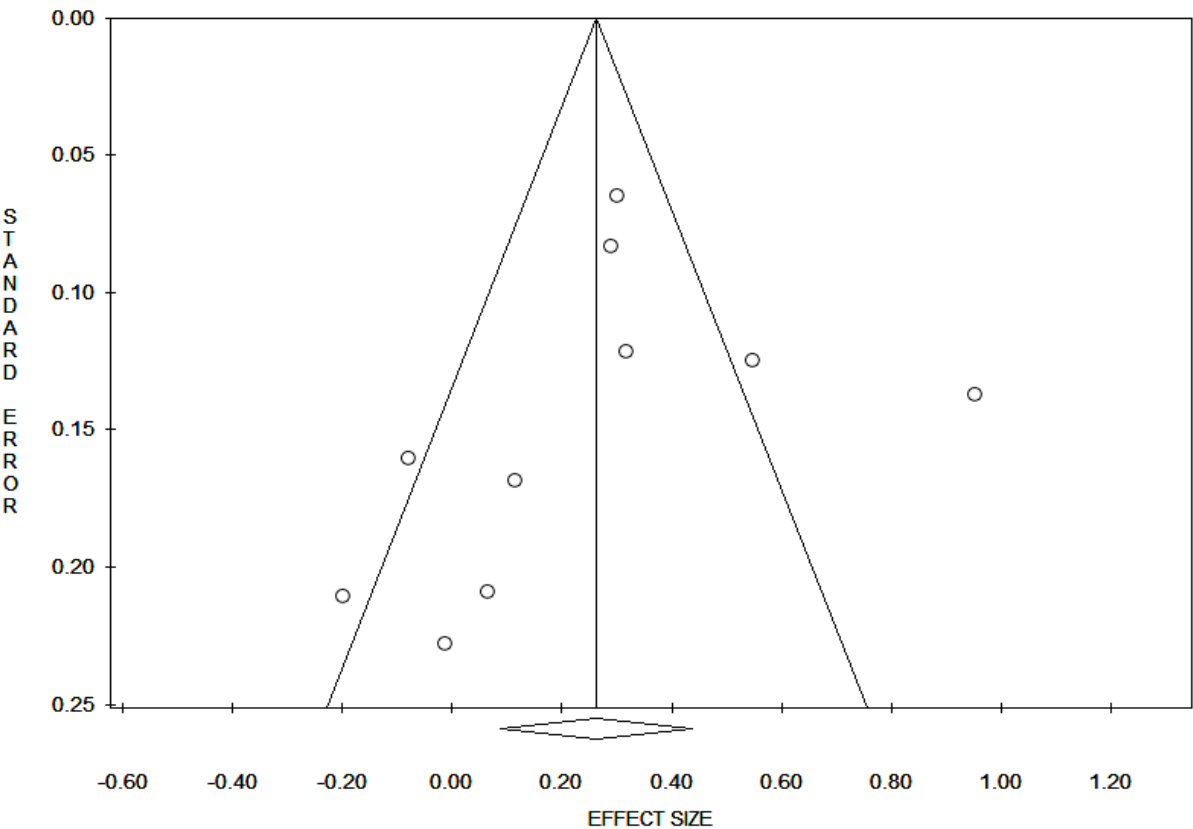

## Supplementary Fig. 4

Forest plot for the dominant (GG or AG vs AA) (A) or the recessive (GG vs AG or AA) (B) model of *OPRM1* rs1799971 for the risk of pruritus following opioid treatment. Note that the diamond symbol in B is shown twice to emphasize the lack of studies for the subgroup of patients with labor pain.

### A

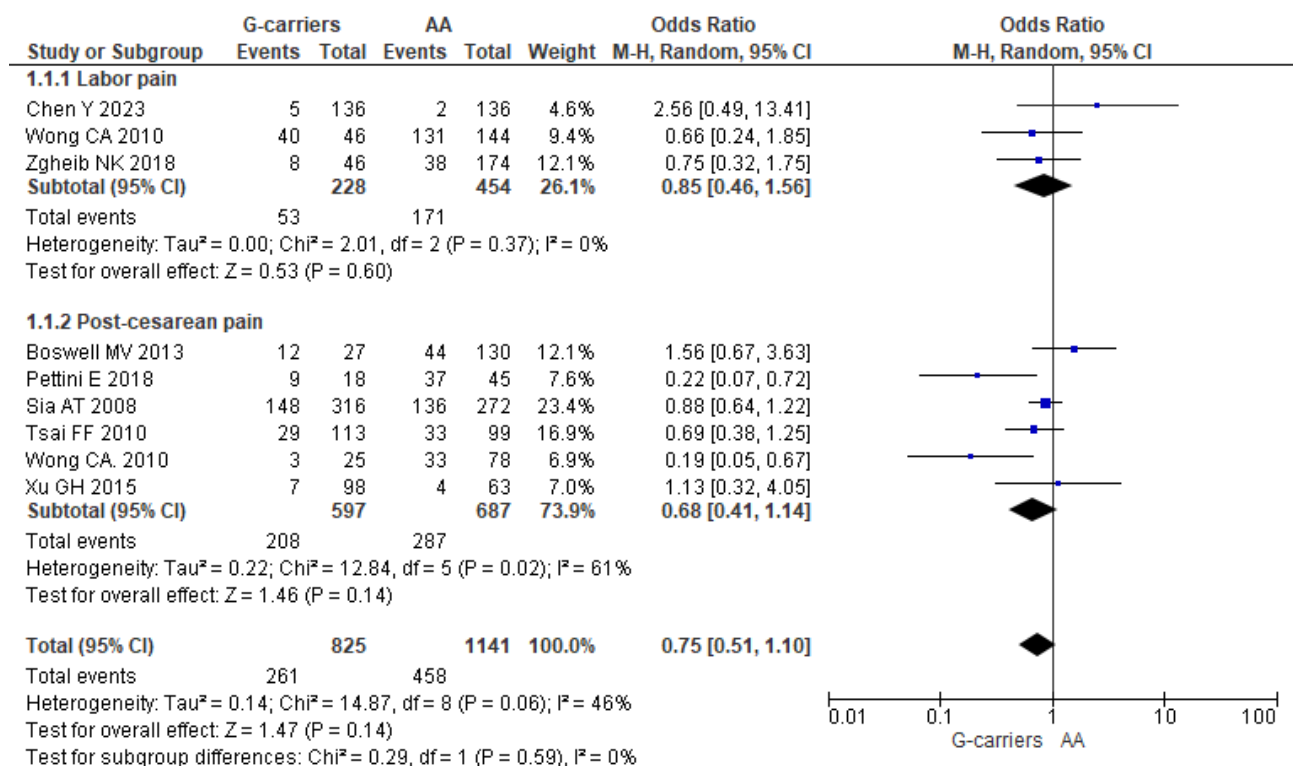

### B

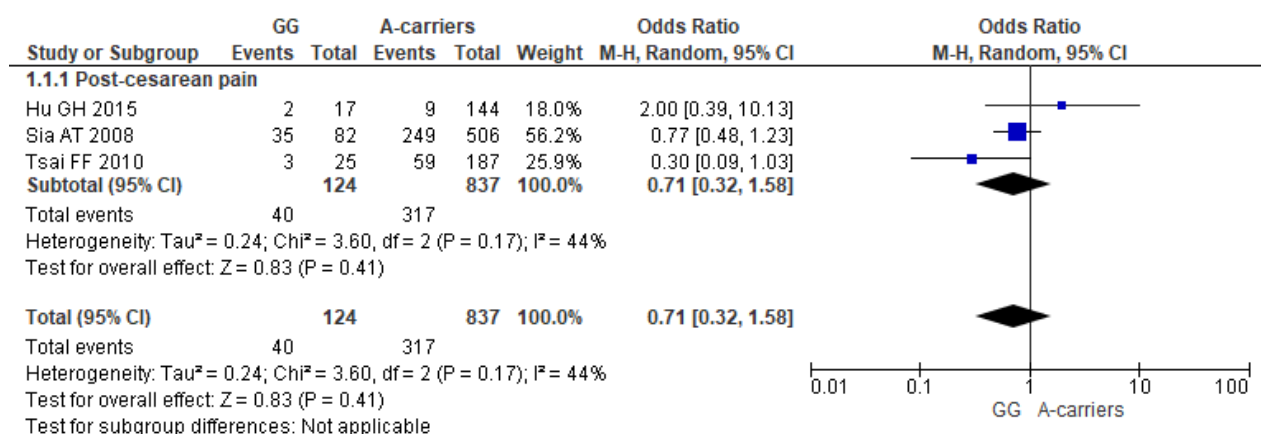

## Supplementary Fig. 5

Forest plot for the dominant (GG or AG vs AA) (A) or the recessive (GG vs AG or AA) (B) model of *OPRM1* rs1799971 for the risk of nausea following opioid treatment for relief of labor pain and post-cesarean pain. Note that the diamond symbol in B is shown twice to emphasize the lack of studies for the subgroup of patients with labor pain.

### A

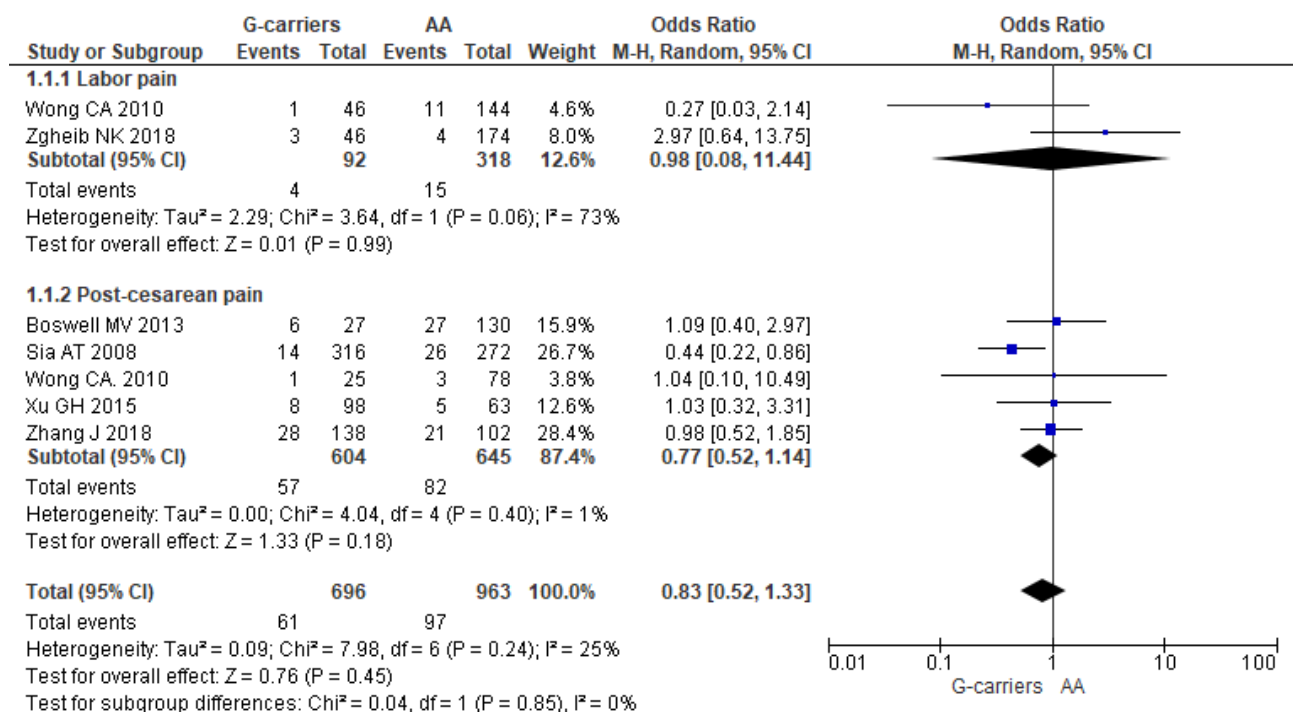

### B

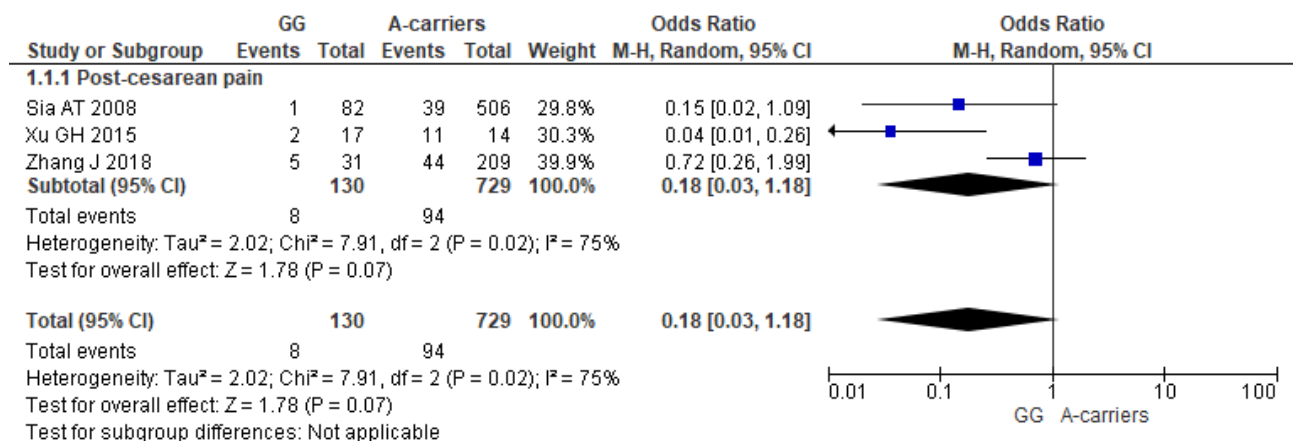

**Supplementary Fig. 6**

Forest plot for the dominant model of *OPRM1* rs1799971 (GG or AG vs AA) for the risk of vomiting following opioid treatment for relief of labor pain and post-cesarean pain.

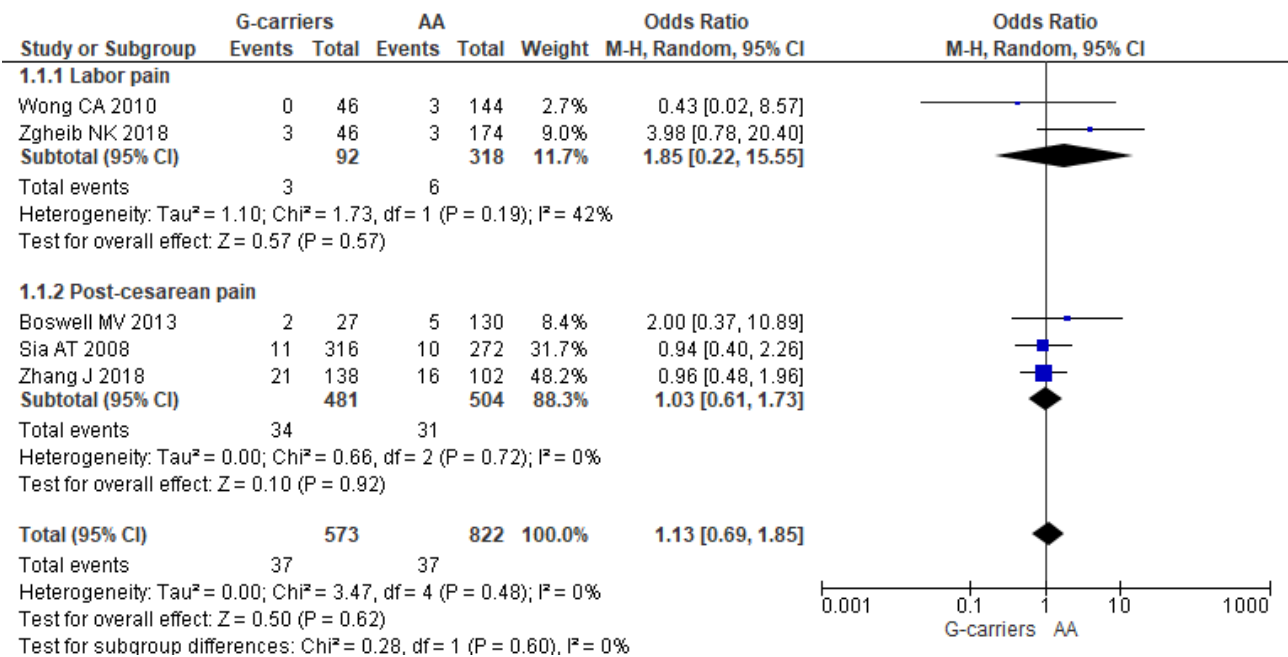



## Supplementary Results

### Quantitative data synthesis for *COMT* rs4680

Four studies were included in the meta-analysis of association between the dominant model of *COMT* rs4680 and total opioid consumption [17, 23, 42, 43], while three studies only were available for the recessive model [23, 42, 43]. In the overall pooled analyses, no significant impact of *COMT* rs4680 was found on total opioid consumption, under either the dominant (Supplementary Fig. 7A) or the recessive genetic model (Supplementary Fig. 7B). Despite a significant difference in total opioid consumption was detected under the dominant model of *COMT* rs4680 within the subgroup of patients with labor pain (GA+AA vs GG, SMD: 0.51; 95% CI: 0.05-0.98; P= 0.03, Supplementary Fig. 7A), this result was limited by significant between-study heterogeneity ( $I^2$ : 76%, P=0.04).

### Quantitative data synthesis for other genetic variants

Meta-analyses with at least three studies were available for the association of *ABCB1* rs1128503 and *CYP3A4* rs2242480 with both pain score after opioid treatment and total opioid consumption, and three studies were available for the association of the genetically predicted *CYP2D6* phenotype with pain score. In all cases, no significant results were found in the pooled analyses, as shown in Supplementary Fig. 8-12.

## Supplementary Fig. 7

Forest plots of the standardized mean differences of total opioid consumption after opioid treatment for relief of labor pain and post-cesarean pain, for the dominant (GA+AA vs GG) (**A**) or the recessive model (AA vs GA+GG) (**B**) of *COMT* rs4680.

**A**

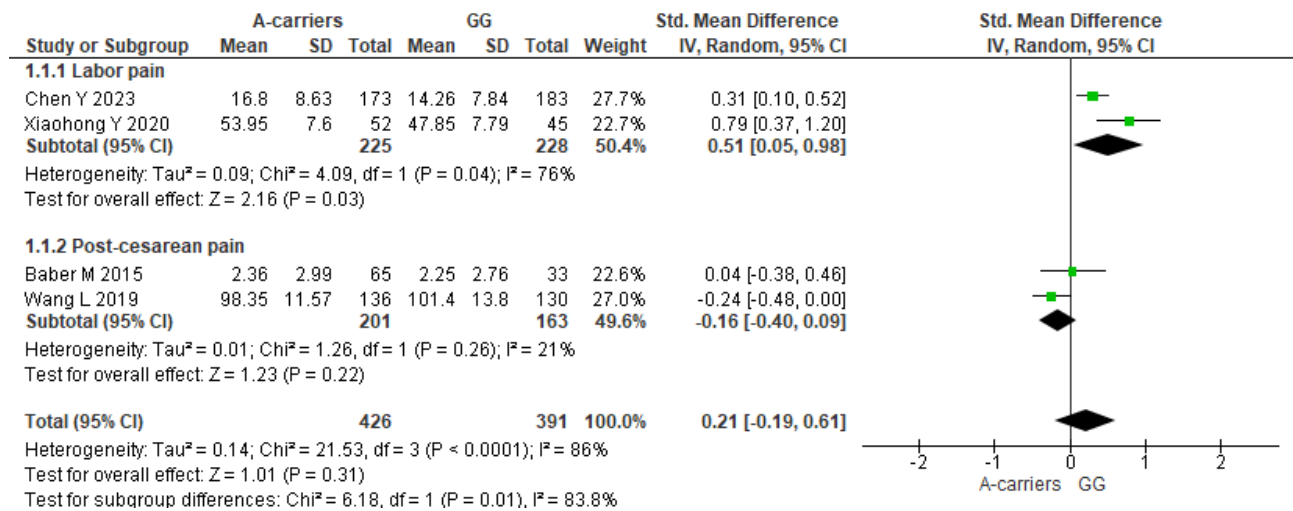

**B**

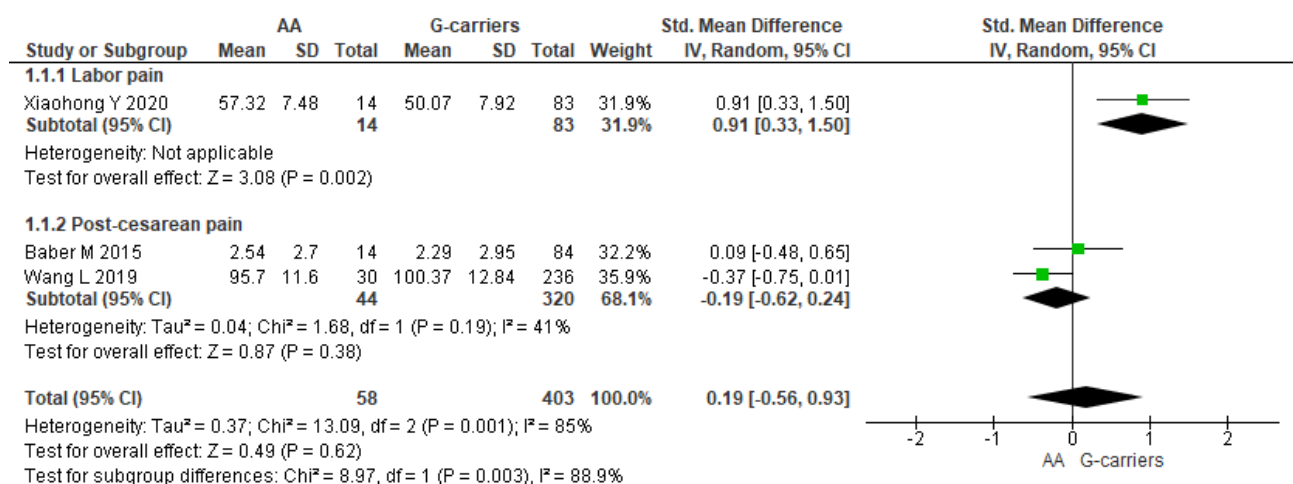

# Supplementary Fig. 8

Forest plots of the standardized mean differences of pain score after opioid treatment for relief of labor pain and post-cesarean pain, for the dominant (CT+TT vs CC) (A) or the recessive model (TT vs CT+CC) (B) of *ABCB1* rs1128503.

A

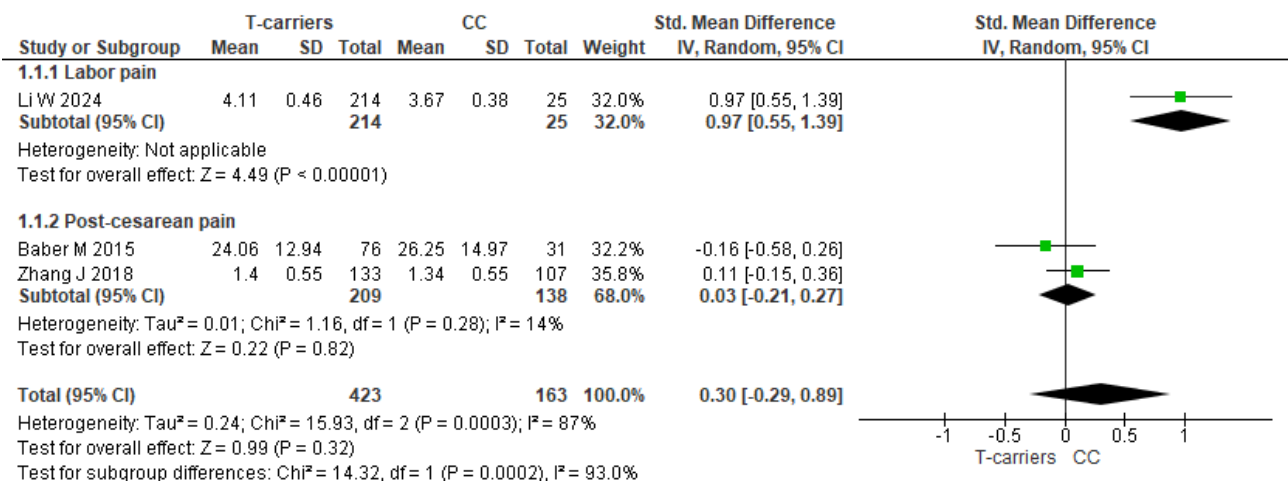

B

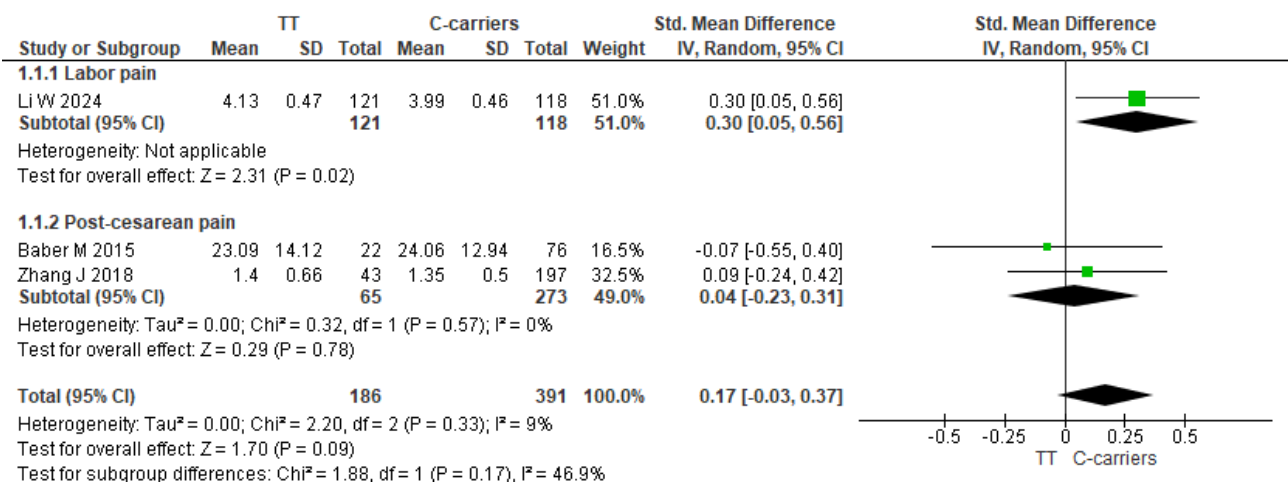

**Supplementary Fig. 9**

Forest plots of the standardized mean differences of total opioid consumption after opioid treatment for relief of post-cesarean pain, for the dominant (CT+TT vs CC) (**A**) or the recessive model (TT vs CT+CC) (**B**) of *ABCB1* rs1128503. Note that the diamond symbol in A and B is shown twice to emphasize the lack of studies for the subgroup of patients with labor pain.

**A**

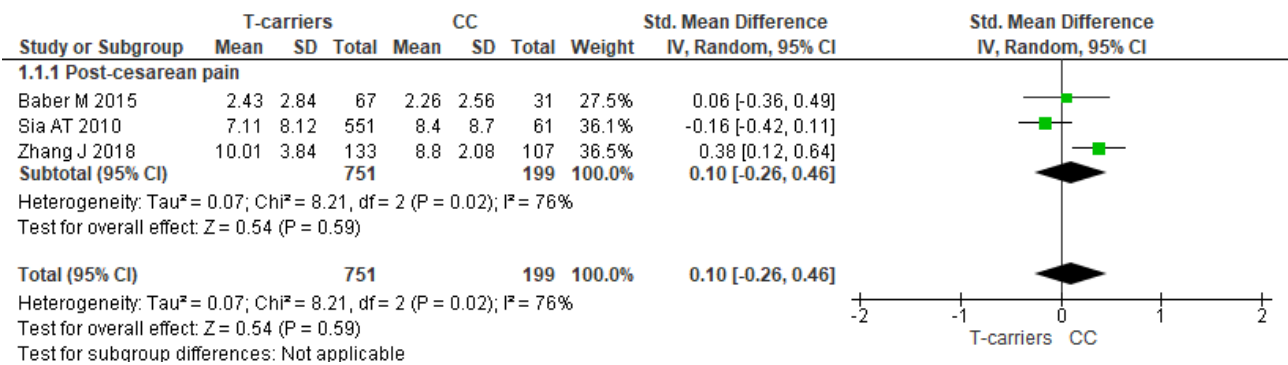

**B**

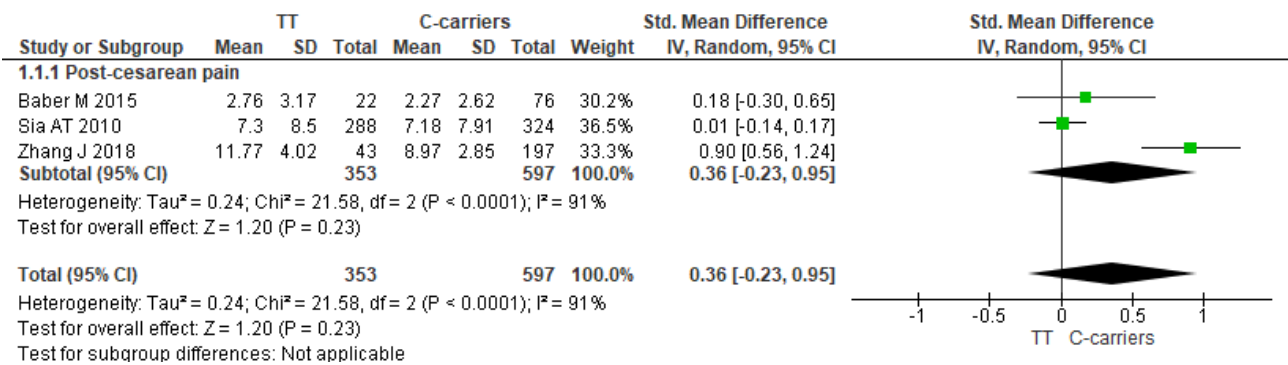

**Supplementary Fig. 10**

Forest plot of the standardized mean difference of pain score after opioid treatment for relief of labor pain and post-cesarean pain, for the dominant model of *CYP3A4* rs2242480 (GA+AA vs GG).

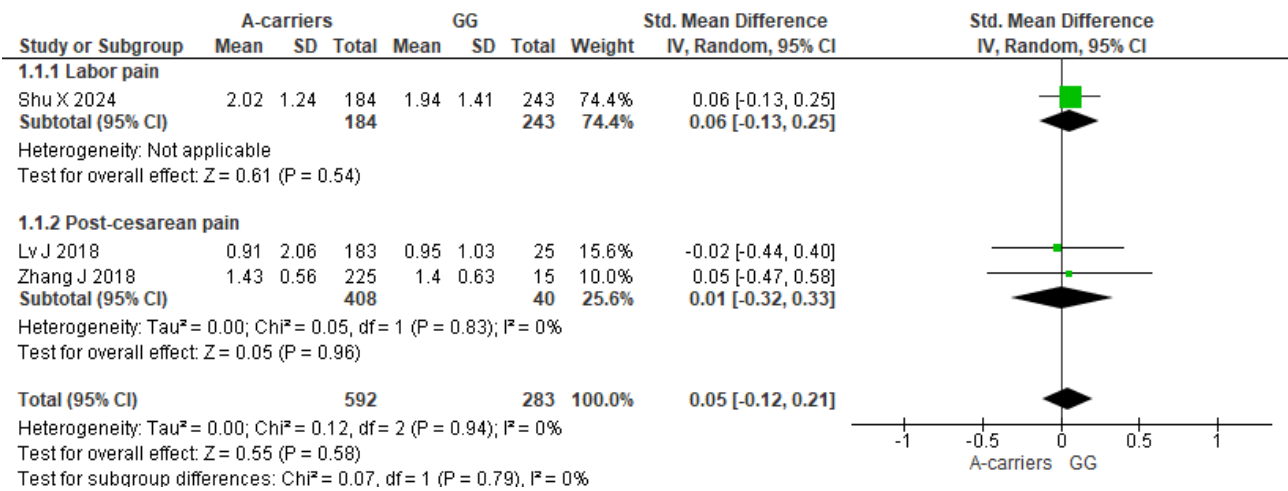

**Supplementary Fig. 11**

Forest plot of the standardized mean differences of total opioid consumption after opioid treatment for relief of labor pain and post-cesarean pain, for the dominant model of *CYP3A4* rs2242480 (GA+AA vs GG).

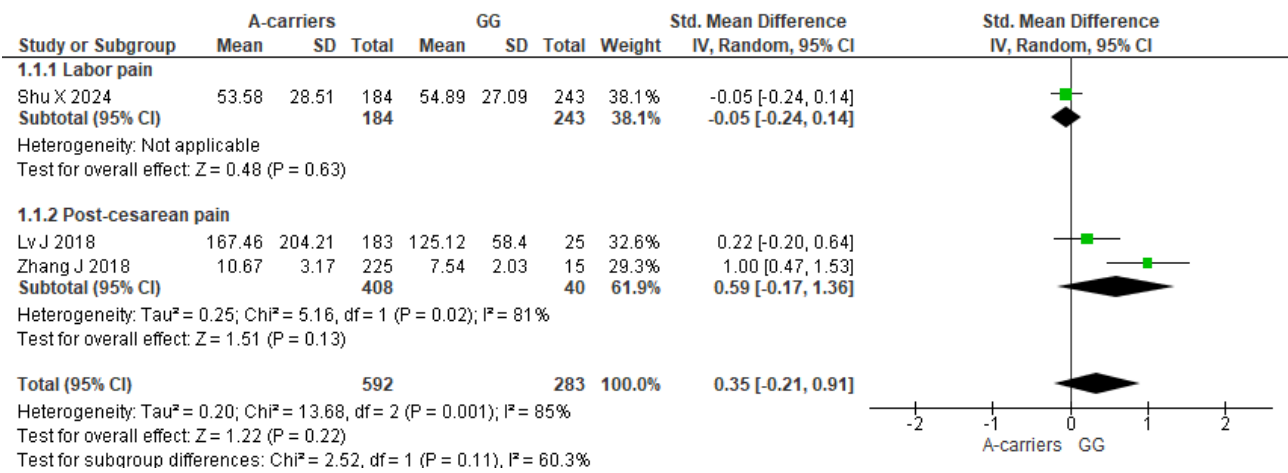

**Supplementary Fig. 12**

Forest plot of the mean difference of pain score after opioid treatment for relief of labor pain and post-cesarean pain, for *CYP2D6* (PM or IM vs UM or EM). Note that the diamond symbol is shown twice to emphasize the lack of studies for the subgroup of patients with labor pain.

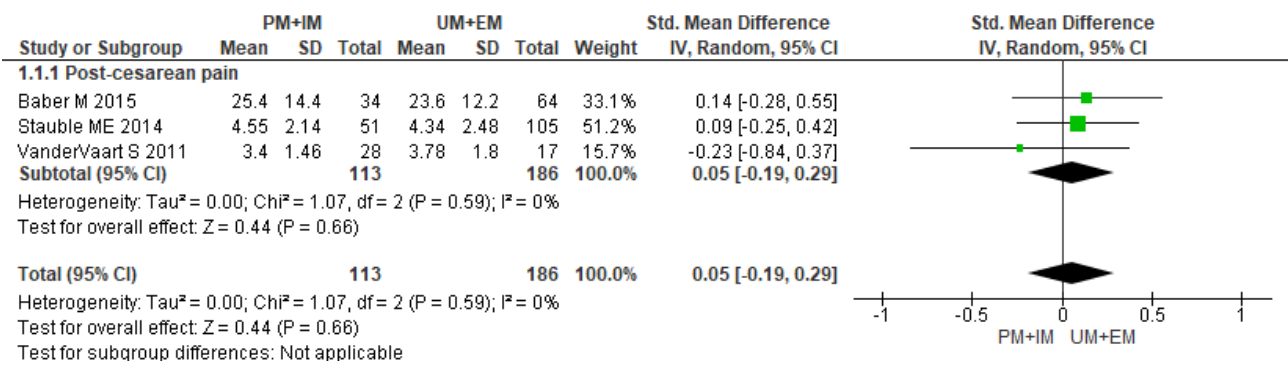

**Supplementary Table 2.** Quality assessment of studies included in the systematic review by the Q-Genie tool.

| Author, year [Ref]        | Question 1 | Question 2 | Question 3 | Question 4 | Question 5 | Question 6 | Question 7 | Question 8 | Question 9 | Question 10 | Question 11 | Final score | Quality of the study |
|---------------------------|------------|------------|------------|------------|------------|------------|------------|------------|------------|-------------|-------------|-------------|----------------------|
| Landau R, 2008 [27]       | 7          | 7          | 7          | 5          | 4          | 5          | 6          | 7          | 5          | 3           | 7           | 63          | Good                 |
| Sia AT, 2008 [18]         | 4          | 6          | 7          | 6          | 1          | 3          | 7          | 7          | 7          | 3           | 7           | 58          | Good                 |
| Tan E, 2009 [19]          | 7          | 5          | 7          | 6          | 1          | 2          | 4          | 7          | 5          | 5           | 7           | 56          | Good                 |
| Sia AT, 2010 [28]         | 7          | 6          | 7          | 7          | 1          | 2          | 7          | 5          | 5          | 3           | 7           | 57          | Good                 |
| Tsai FF, 2010 [29]        | 7          | 7          | 7          | 7          | 4          | 5          | 6          | 7          | 4          | 3           | 5           | 62          | Good                 |
| Wong CA, 2010 [21]        | 7          | 7          | 7          | 5          | 4          | 2          | 6          | 7          | 4          | 3           | 7           | 59          | Good                 |
| De Capraris A, 2011 [30]  | 7          | 7          | 7          | 5          | 4          | 4          | 4          | 7          | 4          | 3           | 4           | 56          | Good                 |
| VanderVaarrt S, 2011 [31] | 7          | 6          | 7          | 5          | 3          | 7          | 1          | 6          | 7          | 3           | 5           | 57          | Good                 |
| Camorcia M, 2012 [32]     | 7          | 7          | 6          | 5          | 4          | 2          | 2          | 5          | 4          | 3           | 4           | 49          | Good                 |
| Landau R, 2013 [33]       | 7          | 7          | 6          | 4          | 4          | 7          | 5          | 7          | 5          | 3           | 7           | 62          | Good                 |
| Boswell MV, 2013 [22]     | 7          | 5          | 5          | 4          | 1          | 3          | 2          | 5          | 5          | 3           | 7           | 47          | Good                 |
| Ginosar Y, 2013 [34]      | 7          | 7          | 5          | 6          | 4          | 3          | 6          | 7          | 5          | 3           | 6           | 59          | Good                 |
| Quinta R, 2014 [35]       | 7          | 5          | 5          | 6          | 1          | 1          | 2          | 5          | 2          | 3           | 3           | 40          | Moderate             |
| Stauble ME, 2014 [36]     | 7          | 5          | 7          | 3          | 1          | 2          | 2          | 7          | 7          | 3           | 5           | 49          | Good                 |
| Baber M, 2015 [23]        | 7          | 4          | 7          | 5          | 1          | 3          | 1          | 7          | 6          | 5           | 5           | 51          | Good                 |
| Xu GH, 2015 [37]          | 7          | 6          | 7          | 5          | 1          | 3          | 6          | 7          | 3          | 3           | 5           | 53          | Good                 |
| Pettini E, 2018 [38]      | 7          | 5          | 6          | 3          | 1          | 2          | 1          | 2          | 3          | 3           | 2           | 35          | Poor                 |



**Supplementary Table 2.** Quality assessment of studies included in the systematic review by the Q-Genie tool (continued).

| Author, year [Ref]    | Question 1 | Question 2 | Question 3 | Question 4 | Question 5 | Question 6 | Question 7 | Question 8 | Question 9 | Question 10 | Question 11 | Final score | Quality of the study |
|-----------------------|------------|------------|------------|------------|------------|------------|------------|------------|------------|-------------|-------------|-------------|----------------------|
| Xie W, 2018 [39]      | 7          | 6          | 7          | 7          | 4          | 2          | 7          | 5          | 7          | 3           | 6           | 61          | Good                 |
| Lv J, 2018 [24]       | 7          | 4          | 5          | 7          | 1          | 5          | 2          | 6          | 6          | 3           | 4           | 50          | Good                 |
| Zhang J, 2018 [20]    | 7          | 5          | 5          | 5          | 1          | 5          | 2          | 6          | 2          | 3           | 4           | 45          | Moderate             |
| Zgheib NK, 2018 [40]  | 7          | 7          | 7          | 7          | 3          | 5          | 6          | 7          | 2          | 3           | 5           | 59          | Good                 |
| Kung CC, 2018 [41]    | 7          | 6          | 1          | 7          | 4          | 2          | 6          | 7          | 5          | 3           | 5           | 53          | Good                 |
| Wang L, 2019 [42]     | 7          | 7          | 7          | 7          | 4          | 6          | 3          | 7          | 5          | 3           | 5           | 61          | Good                 |
| Xiaohong Y, 2020 [43] | 7          | 5          | 7          | 5          | 1          | 1          | 2          | 6          | 3          | 3           | 3           | 43          | Moderate             |
| Chen Y, 2023 [17]     | 7          | 5          | 7          | 5          | 1          | 4          | 6          | 7          | 5          | 3           | 7           | 57          | Good                 |
| Shu X, 2024 [44]      | 7          | 7          | 7          | 7          | 4          | 4          | 4          | 6          | 2          | 3           | 7           | 58          | Good                 |
| Li W, 2024 [45]       | 7          | 5          | 7          | 3          | 4          | 2          | 7          | 2          | 2          | 3           | 3           | 45          | Moderate             |

**Question 1.** Please rate the study on the adequacy of the presented hypothesis and rationale. **Question 2.** Please rate the study on the classification of the outcome (e.g. disease status or quantitative trait). **Question 3.** Please rate the study on the description of comparison groups (e.g. cases and controls). **Question 4.** Please rate the study on the technical classification of the exposure (i.e. the genetic variant). **Question 5.** Please rate the study on the non-technical classification of the exposure (i.e. the genetic variant). **Question 6.** Please rate the study on the disclosure and discussion of sources of bias. **Question 7.** Please rate whether the study was adequately powered. **Question 8.** Please rate the study on description of planned analyses. **Question 9.** Please rate the study on the statistical methods. **Question 10.** Please rate the study on the description and test of all assumptions and inferences. **Question 11.** Please rate the study on whether conclusions drawn by the authors were supported by the results.
